# Supplementary material for: Bis(dialkylamino)cyanoboranes: highly efficient reagents for the Strecker-type aminative cyanation of aldehydes and ketonesElectronic supplementary information (ESI) available: detailed experimental procedures. See http://www.rsc.org/suppdata/cc/b2/b203645b/
Source: Royal Society of Chemistry journal article supplement (doi:10.1039/b203645b), 2002-05-30
Supplement: b203645b.doc [file b203645b.doc]

## Supplementary data

**Bis(dialkylamino)cyanoboranes: Highly Efficient Reagents for the Strecker-type Aminative Cyanation of Aldehydes and Ketones**

Michinori Suginome,* Akihiko Yamamoto, and Yoshihiko Ito

*Department of Synthetic Chemistry and Biological Chemistry, Graduate School of Engineering, Kyoto University, Kyoto 606-8501, Japan*

# Experimental Procedures and Spectral Data

**Caution! All experiments, using cyanoboranes or trimethylsilyl cyanide, should be carried out in a fume hood in order to avoid inhalation of hydrogen cyanide, which may be generated by hydrolysis of the cyanides.**

**General.** All reactions were performed under a nitrogen atmosphere with magnetic stirring. 1H, 11B, and 13C NMR spectra were recorded on a Varian Mercury 400 plus (1H at 400 MHz and 13C at 100 MHz) or a Gemini 2000 (1H at 300 MHz and 13C at 75 MHz) spectrometer at ambient temperature. 1H NMR data are reported as follows: chemical shift in ppm downfield from tetramethylsilane (** scale), multiplicity (s = singlet, d = doublet, t = triplet, q = qualtet, and m = multiplet), coupling constant (Hz), and integration. 11B NMR chemical shifts are reported in ppm downfield from boron trifluoride etherate. 13C NMR chemical shifts are reported in ppm downfield from tetramethylsilane. All 13C NMR spectra were obtained with complete proton decoupling. High-resolution mass spectra were recorded on a JEOL JMS-SX102A (EI) spectrometer.

Anhydrous THF (Kanto) and EtOH (Wako) were purchased from commercial sources. BCl3 (1 M in CH2Cl2, Aldrich), BCl3•SMe2 (Aldrich), THF-*d*8 (Aldrich), ammonia (2.0 M in EtOH, Aldrich), and *p*-nitrobenzaldehyde (Aldrich) were used as received from the commercial source. Benzaldehyde (Nacalai), *p*-methoxybenzaldehyde (Nacalai), furfural (Aldrich), 2-pyridinecarboxaldehyde (Wako), *trans*-cinnamaldehyde (Nacalai), heptanal (Wako), 3-phenylpropionaldehyde (Nacalai), cyclohexanecarboxaldehyde (TCI), pivalaldehyde (TCI), acetone (Kanto), 4-phenylbutan-2-one (TCI), acetophenone (Wako), cyclopentanone (Wako), cyclohexanone (Nacalai), trimethylsilyl cyanide (TCI), *N*-trimethylsilyldiethylamine (Aldrich), *N*-trimethylsilylmorpholine (TCI) and *N*-trimethylsilylpyrrolidine (Aldrich) were obtained from the commercial sources and purified by distillation. *N*-Trimethylsilyldibenzylamine was prepared by the reaction of dibenzylamine with trimethylsilyl chloride (1.5 equiv) in the presence of triethylamine (1.5 equiv) in THF at room temperature (47%). Bis(diethylamino)chloroborane and bis(diisopropylamino)chloroborane were prepared according to the literature procedures.[[1]](#footnote-2)

**Preparation of Bis(diethylamino)cyanoborane (1a).** A mixture of bis(diethylamino)chloroborane (16.9 g, 89 mmol) and trimethylsilyl cyanide (9.2 g, 93 mmol) was stirred at room temperature for 12 h. Distillation (55-58 °C/0.4 mmHg) afforded **1a** as colorless liquid (15.5 g, 97%). **1a**: 1H NMR (C6D6) ** 0.82 (t, J = 7.2 Hz, 12H), 2.81 (q, J = 7.2 Hz, 8H); 13C NMR (C6D6) ** 16.1, 43.9 (cyano carbon not detected); 11B NMR (C6D6) ** 19.7; IR (neat, under N2) 2212 cm-1.

**Preparation of Bis(diisopropylamino)cyanoborane (1e).** A mixture of bis(diisopropylamino)chloroborane (9.8 g, 40 mmol) and trimethylsilyl cyanide (4.8 g, 44 mmol) was stirred at room temperature. After 10 h, the volatile material was removed under vacuum to give **1e** as off-white powder. This material was essentially pure by 1H NMR determination and used without further purification. **1e**: 1H NMR (C6D6) ** 1.13 (d, J = 6.9 Hz, 24H), 3.18 (septet, J = 6.9 Hz, 4H); 13C NMR (C6D6) ** 24.1, 27.4 (cyano carbon not detected); 11B NMR (C6D6) ** 20.8.

**General Procedure for the One-pot Synthesis of Bis(dialkylamino)cyanoboranes from BCl3.**  To a solution of BCl3 (1 M in CH2Cl2, 0.60 mL, 0.60 mmol) was added *N*-trimethylsilyl-*N*,*N*-dialkylamine (1.2 mmol) dropwise at room temperature. The mixture was stirred at room temperature for 30 min. To this mixture was added trimethylsilyl cyanide (60 mg, 0.60 mmol). The mixture was stirred for 5 h (for the preparation of **1a**, **1c**, and **1d**) or 24 h (for **1b**) at room temperature. The volatile material was removed under vacuum (0.5 mmHg) to give the corresponding bis(dialkylamino)cyanoboranes **1** which can be used for the aminative cyanation. **1b** (off-white solid): 1H NMR (C6D6) ** 4.13 (s, 8H), 6.97-7.10 (m, 20H); 13C NMR (C6D6) ** 52.9, 127.8, 127.9, 129.3, 139.2 (cyano carbon not detected); 11B NMR (C6D6) ** 21.9. **1c** (colorless liquid): 1H NMR (C6D6) ** 1.26-1.31 (m, 8H), 3.08 (br s, 8H); 13C NMR (C6D6) ** 26.5, 49.5 (cyano carbon not detected); 11B NMR (C6D6) ** 18.1. **1d** (off-white solid): 1H NMR (C6D6) ** 2.73 (t, J = 4.4 Hz, 8H), 3.17 (t, J = 4.4 Hz, 8H); 13C NMR (C6D6) ** 48.6, 68.1 (cyano carbon not detected); 11B NMR (C6D6) ** 19.3.

**General Procedure for the Reaction of 1a with Aldehydes (Table 1, entries 1-10).**  To a solution of aldehyde (0.40 mmol) in THF (0.7 mL) was added **1a** (72 mg, 0.40 mmol) at room temperature. The mixture was stirred at room temperature for the period indicated in Table 1. The mixture was passed through a short column of Florisil or silica gel (eluent: ether) and the filtrate was evaporated in vacuo to give **-diethylamino nitriles. Thus obtained materials were spectroscopically pure.

**(Diethylamino)phenylacetonitrile (3aa).**

CAS registry No. [5097-99-4]

1H NMR (CDCl3) ** 1.08 (t, J = 7.2 Hz, 6H), 2.47 (dq, J = 12.9, 6.9 Hz, 2H), 2.68 (dq, J = 12.9, 7.2 Hz, 2H), 5.03 (s, 1H), 7.34-7.43 (m, 3H), 7.53-7.58 (m, 2H); 13C NMR (CDCl3) ** 13.1, 44.9, 58.2, 116.4, 127.7, 128.6, 128.7, 134.7; IR (neat) 2232 cm-1.

**(Diethylamino)(4-methoxyphenyl)acetonitrile (3ab).**

CAS registry No. [85574-14-7]

1H NMR (C6D6) ** 0.75 (t, J = 7.2 Hz, 6H), 2.25 (dq, J = 13.2, 7.2 Hz, 2H), 2.44 (dq, J = 12.8, 7.6 Hz, 2H), 3.21 (s, 3H), 4.48 (s, 1H), 6.67 (d, J = 8.8 Hz, 2H), 7.38 (d, J = 8.8 Hz, 2H); 13C NMR (C6D6) ** 13.1, 44.7, 55.3, 57.6, 114.0, 116.7, 126.6, 128.9, 159.8.

**(Diethylamino)(4-nitrophenyl)acetonitrile (3ac).**

1H NMR (CDCl3) ** 1.10 (t, J = 7.2 Hz, 6H), 2.52 (dq, J = 13.5, 7.2 Hz, 2H), 2.65 (dq, J = 13.5, 7.2 Hz, 2H), 5.07 (s, 1H), 7.75-7.82 (m, 2H), 8.23-8.30 (m, 2H); 13C NMR (CDCl3) ** 13.1, 45.2, 57.8, 115.4, 123.9, 128.6, 142.0, 148.3; IR (neat) 2232 cm-1. HRMS Calcd. for C12H15N3 O2: 233.1164. Found: 233.1167.

**(Diethylamino)furan-2-ylacetonitrile (3ad).**

CAS registry No. [56791-44-7]

1H NMR (C6D6) ** 1.09 (t, J = 7.2 Hz, 6H), 2.52 (dq, J = 14.1, 6.9 Hz, 2H), 2.73 (dq, J = 12.9, 7.5 Hz, 2H), 5.00 (s, 1H), 6.34-6.40 (m, 1H), 6.48-6.55 (m, 1H), 7.39-7.46 (m, 1H).

**(Diethylamino)pyrid-2-ylacetonitrile (3ae).**

CAS registry No. [56707-13-2]

1H NMR (CDCl3) ** 1.10 (t, J = 7.2 Hz, 6H), 2.56 (dq, J = 13.5, 6.9 Hz, 2H), 2.71 (dq, J = 12.9, 7.2 Hz, 2H), 5.12 (s, 1H), 7.25-7.31 (m, 1H), 7.57 (d, J = 7.8 Hz, 1H), 7.73 (dt, J = 1.8, 7.8 Hz, 1H), 8.62-8.64 (m, 1H); 13C NMR (CDCl3) ** 13.0, 45.4, 60.7, 116.0, 122.2, 123.4, 137.0, 149.6, 154.8.

**2-Diethylamino-4-phenylbutenenitrile (3af).**

1H NMR (C6D6) ** 0.79 (t, J = 7.2 Hz, 6H), 2.23 (dq, J = 12.9, 6.9 Hz, 2H), 2.49 (dq, J = 12.9, 6.9 Hz, 2H), 4.01-4.05 (m, 1H), 5.81 (dd, J = 4.2, 15.0 Hz, 1H), 6.91 (d, J = 15.0 Hz, 1H), 6.97-7.16 (m, 5H); 13C NMR (CDCl3) ** 13.1, 45.1, 56.1, 116.1, 123.3, 126.8, 128.5, 128.8, 134.1, 135.6; IR (neat) 2212 cm-1. HRMS Calcd. for C14H18N2: 214.1470 (M+). Found: 214.1471.

**2-(Diethylamino)octanenitrile (3ag).**

1H NMR (C6D6) ** 0.83 (t, J = 7.2 Hz, 6H), 0.86 (t, J = 6.9 Hz, 3H), 1.00-1.30 (m, 8H), 1.43 (dt, J = 7.5, 8.1 Hz, 2H), 2.23 (dq, J = 12.9, 6.9 Hz, 2H), 2.43 (dq, J = 12.9, 7.2 Hz, 2H), 3.20 (t, J = 7.5 Hz, 1H); 13C NMR (C6D6) ** 13.7, 14.4, 23.1, 26.4, 29.1, 32.1, 32.4, 45.5, 54.4, 118.6; IR (neat) 2228 cm-1. Anal. Calcd. for C12H24N2: C, 73.41; H, 12.32; N, 14.27. Found: C, 73.14; H, 12.04; N, 14.08.

**2-(Diethylamino)-4-phenylbutyronitrile (3ah).**

CAS registry No. [201148-87-0]

1H NMR (CDCl3) ** 1.06 (t, J = 7.5 Hz, 6H), 2.08 (q, J = 7.5 Hz, 2H), 2.35-2.49 (m, 2H), 2.65-2.83 (m, 4H), 3.56 (t, J = 7.5 Hz, 1H), 7.17-7.29 (m, 5H); 13C NMR (CDCl3) ** 13.2, 31.8, 33.3, 45.2, 53.1, 118.5, 126.4, 128.6, 128.6, 140.2; IR (neat) 2228 cm-1.

**Cyclohexyl(diethylamino)acetonitrile (3ai).**

1H NMR (C6D6) ** 0.60-0.69 (m, 1H), 0.79-0.92 (m, 1H), 0.89 (t, J = 7.3 Hz, 6H), 0.98-1.19 (m, 3H), 1.49 (tq, J = 3.5, 10.8 Hz, 1H), 1.54-1.68 (m, 3H), 1.96-2.03 (m, 1H), 2.04-2.11 (m, 1H), 2.32 (dq, J = 13.2, 6.8 Hz, 2H), 2.49 (dq, J = 13.2, 7.3 Hz, 2H), 3.01 (d, J = 10.6 Hz, 1H); 13C NMR (C6D6) ** 13.6, 25.9, 26.1, 26.8, 30.6, 31.1, 38.7, 45.6, 60.8, 117.7; IR (neat) 2228 cm-1. Anal. Calcd. for C12H22N2: C, 74.17; H, 11.41; N, 14.42. Found: C, 74.39; H, 11.66; N, 14.25.

**2-(Diethylamino)-3,3-dimethylbutyronitrile (3aj).**

1H NMR (C6D6) ** 0.77 (t, J = 6.9 Hz, 6H), 0.83 (s, 9H), 2.32 (m, 4H), 2.83 (s, 1H); 13C NMR (C6D6) ** 13.4, 27.1, 35.9, 47.8, 64.8, 117.5; IR (neat) 2228 cm-1. HRMS Calcd. for C10H20N2: 168.1627 (M+). Found: 168.1624.

**General Procedure for the Reaction of 1b-1d with Aldehydes (Table 1, entries 11-13).** To cyanoboranes **1** (0.60 mmol) prepared by the one-pot procedure from BCl3 (see above) was dissolved in THF (1.0 mL). To the solution was added aldehyde (0.50 mmol) at room temperature. The mixture was stirred at room temerature for the period indicated in Table 1. The mixture was passed through a short column of Florisil (eluent: ether) and the volatile material was removed under vacuum. Compounds **3ci** and **3di** were obtained in spectroscopically pure forms. Compound **3bi** was obtained as a mixture with dibenzylamine, which was purified by silica gel column chromatography (hexane:EtOAc = 50/1).

**Cyclohexyl[di(phenylmethyl)amino]acetonitrile (3bi).**

mp 134.4–135.3 °C:  1H NMR (CDCl3) ** 0.71 (dq, J = 3.3, 12.3 Hz, 1H), 0.90 (dq, J = 3.3, 12.3 Hz, 1H), 1.00-1.34 (m, 3H), 1.57-1.89 (m, 4H), 1.96 (d, J = 13.2 Hz, 1H), 2.23 (d, J = 13.2 Hz, 1H), 3.23 (d, J = 10.8 Hz, 1H), 3.35 (d, J = 13.8 Hz, 2H), 3.95 (d, J = 13.8 Hz, 2H), 7.23-7.43 (m, 10H); 13C NMR (CDCl3) 25.3, 25.5, 26.1, 29.8, 30.7, 37.7, 55.4, 59.2, 116.9, 127.5, 128.6, 128.8, 137.9; IR (neat) 2223 cm-1. Anal. Calcd. for C22H26N2: C, 82.97; H, 8.23; N, 8.80. Found: C, 83.04; H, 8.34; N, 8.81.

**Cyclohexyl(pyrolidin-1-yl)acetonitrile (3ci).**

mp 57.0–57.7 °C. 1H NMR (CDCl3) ** 0.84-1.36 (m, 5H), 1.54-1.89 (m, 8H), 2.01 (t, J = 12.3 Hz, 2H), 2.53-2.75 (m, 4H), 3.04 (d, J = 10.2 Hz, 1H); 13C NMR (CDCl3) ** 23.4, 25.5, 25.6, 26.3, 29.9, 30.6, 39.4, 50.0, 61.6, 117.3; IR (neat) 2219 cm-1. Anal. Calcd. for C12H20N2: C, 74.95; H, 10.48; N, 14.57. Found: C, 74.66; H, 10.67; N, 14.51.

**Cyclohexyl(morpholin-4-yl)acetonitrile (3di).**

mp 99.8–100.7 °C:  1H NMR (C6D6) ** 0.51 (q, J = 11.7 Hz, 1H), 0.67 (q, J = 11.7 Hz, 1H), 0.82-1.08 (m, 3H), 1.28 (q, J = 11.1 Hz, 1H), 1.38-1.58 (m, 3H), 1.72 (d, J = 13.8 Hz, 1H), 1.90 (d, J = 13.8 Hz, 1H), 1.96-2.07 (m, 2H), 2.18-2.29 (m, 2H), 2.51 (d, J = 13.2 Hz, 1H), 3.30-3.46 (m, 4H); 13C NMR (C6D6) ** 25.9, 26.0, 26.8, 30.1, 31.0, 37.4, 50.7, 64.7, 66.9, 116.3; IR (neat) 2219 cm-1. Anal. Calcd. for C12H20N2O: C, 69.19; H, 9.68; N, 13.45. Found: C, 69.20; H, 9.44; N, 13.46.

**Synthesis of Cyclohexyl(diisopropylamino)acetonitrile (3ei).**

A mixture of **1e** (104 mg, 0.44 mmol) and cyclohexanecarboxaldehyde (45 mg, 0.40 mmol) in THF (0.7 mL) was stirred at 50 °C for 30 h. The mixture was passed through a short column of Florisil (ether) and the resultant solution was washed with water (twice). After the solution was dried over MgSO4, spectroscopically pure **3ei** (83 mg, 92%) was obtained. **3ei**: 1H NMR (C6D6) **0.35-0.50 (m, 1H), 0.58-0.75 (m, 1H), 0.71 (d, J = 6.6 Hz, 6H), 0.82-1.02 (m, 3H), 1.05 (d, J = 6.6 Hz, 6H), 1.24-1.39 (m, 2H), 1.42-1.62 (m, 3H), 1.85 (d, J = 12.6 Hz, 1H), 2.05 (d, J = 12.6 Hz, 1H), 2.81 (d, J = 10.2 Hz, 1H), 2.84 (sep, J = 6.6 Hz, 2H); 13C NMR (C6D6) ** 19.3, 23.7, 26.3, 26.4, 26.9, 30.9, 39.7, 46.7, 53.3, 122.0; IR (neat) 2228 cm-1. Anal. Calcd. for C14H26N2 O: C, 75.62; H, 11.79; N, 12.60. Found: C, 75.60; H, 11.69; N, 12.38.

**Synthesis of Phenyl(diisopropylamino)acetonitrile (3ea).**

According to a procedure similar to that for the synthesis of **3ei**, compound **3ea** was synthesized from **1e** (104 mg, 0.44 mmol) and benzaldehyde (42 mg, 0.40 mmol) in THF (0.7 mL) (50 °C, 150 h). **3ea**: 1H NMR (CDCl3) **1.04 (d, J = 6.9 Hz, 6H), 1.28 (d, J = 6.9 Hz, 6H), 3.18 (septet, J = 6.9 Hz, 2H), 4.97 (s, 1H), 7.29-7.42 (m, 3H), 7.56-7.63 (m, 2H); 13C NMR (CDCl3) ** 19.4, 23.3, 46.6, 50.9, 121.0, 127.2, 128.2, 128.5, 136.6; IR (neat) 2228 cm-1.

**General Procedure for the Reaction of 1d with Ketones (Table 2).** To cyanoborane **1d** (126 mg, 0.60 mmol) prepared by the one-pot procedure from BCl3 (see above) was dissolved in THF (0.5 mL). To the solution was added the corresponding ketone (0.50 mmol) at room temperature. The mixture was stirred at room temperature (for acetone, cyclohexanone, and cyclopentanone) or at 50 °C (for 4-phenylbutan-2-one and acetophenone) for the period indicated in Table 2. The mixture was passed through a short column of Florisil (eluent: ether) to give spectroscopically pure **-amino nitriles.

**2-Methyl-2-(morpholin-4-yl)propionitrile (5a).**

CAS registry No. [35666-81-0]

1H NMR (CDCl3) **0.97 (s, 6H), 2.27 (t, J = 4.8 Hz, 4H), 3.47 (t, J = 4.8 Hz, 4H).

**2-Methyl-2-(morpholin-4-yl)-4-phenylbutyronitrile (5b).**

1H NMR (CDCl3) **1.53 (s, 3H), 2.08 (dt, J = 13.8, 3.6 Hz, 2H), 2.65 (t, J = 4.5 Hz, 4H), 2.75 (dt, J = 13.8, 3.6 Hz, 2H), 3.75 (t, J = 4.5 Hz, 4H), 7.14-7.34 (m, 5H); 13C NMR (CDCl3) ** 21.9, 29.4, 38.9, 47.6, 59.7, 66.9, 119.7, 126.4, 128.3, 128.7, 140.7; IR (neat) 2224 cm-1. Anal. Calcd. for C14H20N2 O: C, 73.74; H, 8.25; N, 11.47. Found: C, 74.00; H, 8.50; N, 11.31.

**2-(Morpholin-4-yl)-2-phenylpropionitrile (5c).**

1H NMR (CDCl3) ** 1.72 (s, 3H), 2.39-2.50 (m, 2H), 2.62-2.73 (m, 2H), 3.65-3.78 (m, 4H), 7.30-7.42 (m, 3H), 7.56-7.62 (m, 2H); 13C NMR (CDCl3) ** 28.2, 48.4, 66.1, 66.9, 117.8, 125.9, 128.6, 129.0, 140.2; IR (neat) 2223 cm-1. Anal. Calcd. for C13H16N2O: C, 72.19; H, 7.40; N, 12.95. Found: C, 72.31; H, 7.44; N, 12.90.

**1-(Morpholin-4-yl)cyclohexanecarbonitrile (5d).**

CAS registry No. [42419-59-0]

1H NMR (C6D6) ** 0.92-1.03 (m, 1H), 1.00-1.09 (m, 2H), 1.16-1.36 (m, 5H), 1.53-1.61 (m, 2H), 2.24 (t, J = 4.8 Hz, 4H), 3.43 (t, J = 4.8 Hz, 4H); 13C NMR (C6D6) ** 22.3, 25.4, 33.8, 47.5, 61.1, 67.3, 119.1; IR (neat) 2224 cm-1.

**1-(Morpholin-4-yl)cyclopentanecarbonitrile (5e).**

CAS registry No. [62317-19-5]

1H NMR (C6D6) ** 1.13-1.38 (m, 4H), 1.43-1.58 (m, 2H), 1.66-1.75 (m, 2H), 2.24 (t, J = 4.8 Hz, 4H), 3.41 (t, J = 4.8 Hz, 4H).

1. () Chavant, P. Y.; Vaultier, M. *J. Organomet. Chem.* **1993**, *455*, 37. [↑](#footnote-ref-2)
